# Supplementary material for: Mapping autophagosome contents identifies interleukin-7 receptor-α as a key cargo modulating CD4+ T cell proliferation
Source: PubMed Central journal article supplement (PMC9440129; doi:10.1038/s41467-022-32718-x), 2022-09-02
Supplement: 41467_2022_32718_MOESM1_ESM.pdf [file 41467_2022_32718_MOESM1_ESM.pdf]

## Supplementary Materials for

### **Mapping autophagosome contents identifies interleukin-7 receptor- $\alpha$ as a key cargo modulating CD4+ T cell proliferation**

Dingxi Zhou<sup>1</sup>, Mariana Borsa<sup>1</sup>, Daniel J. Puleston<sup>1</sup>, Susanne Zellner<sup>2</sup>, Jesusa Capera<sup>1</sup>, Sharon Sanderson<sup>1</sup>, Martina Schifferer<sup>3,4</sup>, Svenja S. Hester<sup>5</sup>, Xin Ge<sup>1</sup>, Roman Fischer<sup>5,6</sup>, Luke Jostins<sup>1</sup>, Christian Behrends<sup>2#</sup>, Ghada Alsaleh<sup>1,7#</sup>, Anna Katharina Simon<sup>1#\*</sup>

#Authors contributed equally

\*Corresponding author: [katja.simon@imm.ox.ac.uk](mailto:katja.simon@imm.ox.ac.uk)

|                                                                                                    |    |
|----------------------------------------------------------------------------------------------------|----|
| <i>Supplementary Data</i> .....                                                                    | 2  |
| Supplementary Fig. 1 Autophagy-deficient CD4+ T cells show delayed proliferation. ....             | 4  |
| Supplementary Fig. 2 Validation of the <i>Lc3b-AP2</i> transgenic mouse model. ....                | 7  |
| Supplementary Fig. 3 IL-7R $\alpha$ is an autophagosomal cargo in CD4+ T cells. ....               | 9  |
| Supplementary Fig. 4 Impaired IL-2R assembly in activated T-Atg7 <sup>-/-</sup> CD4+ T cells. .... | 11 |
| Supplementary Table 1. The sequences of the primers that were used in this research....            | 13 |

**Supplementary Data**

Supplementary Fig. 1

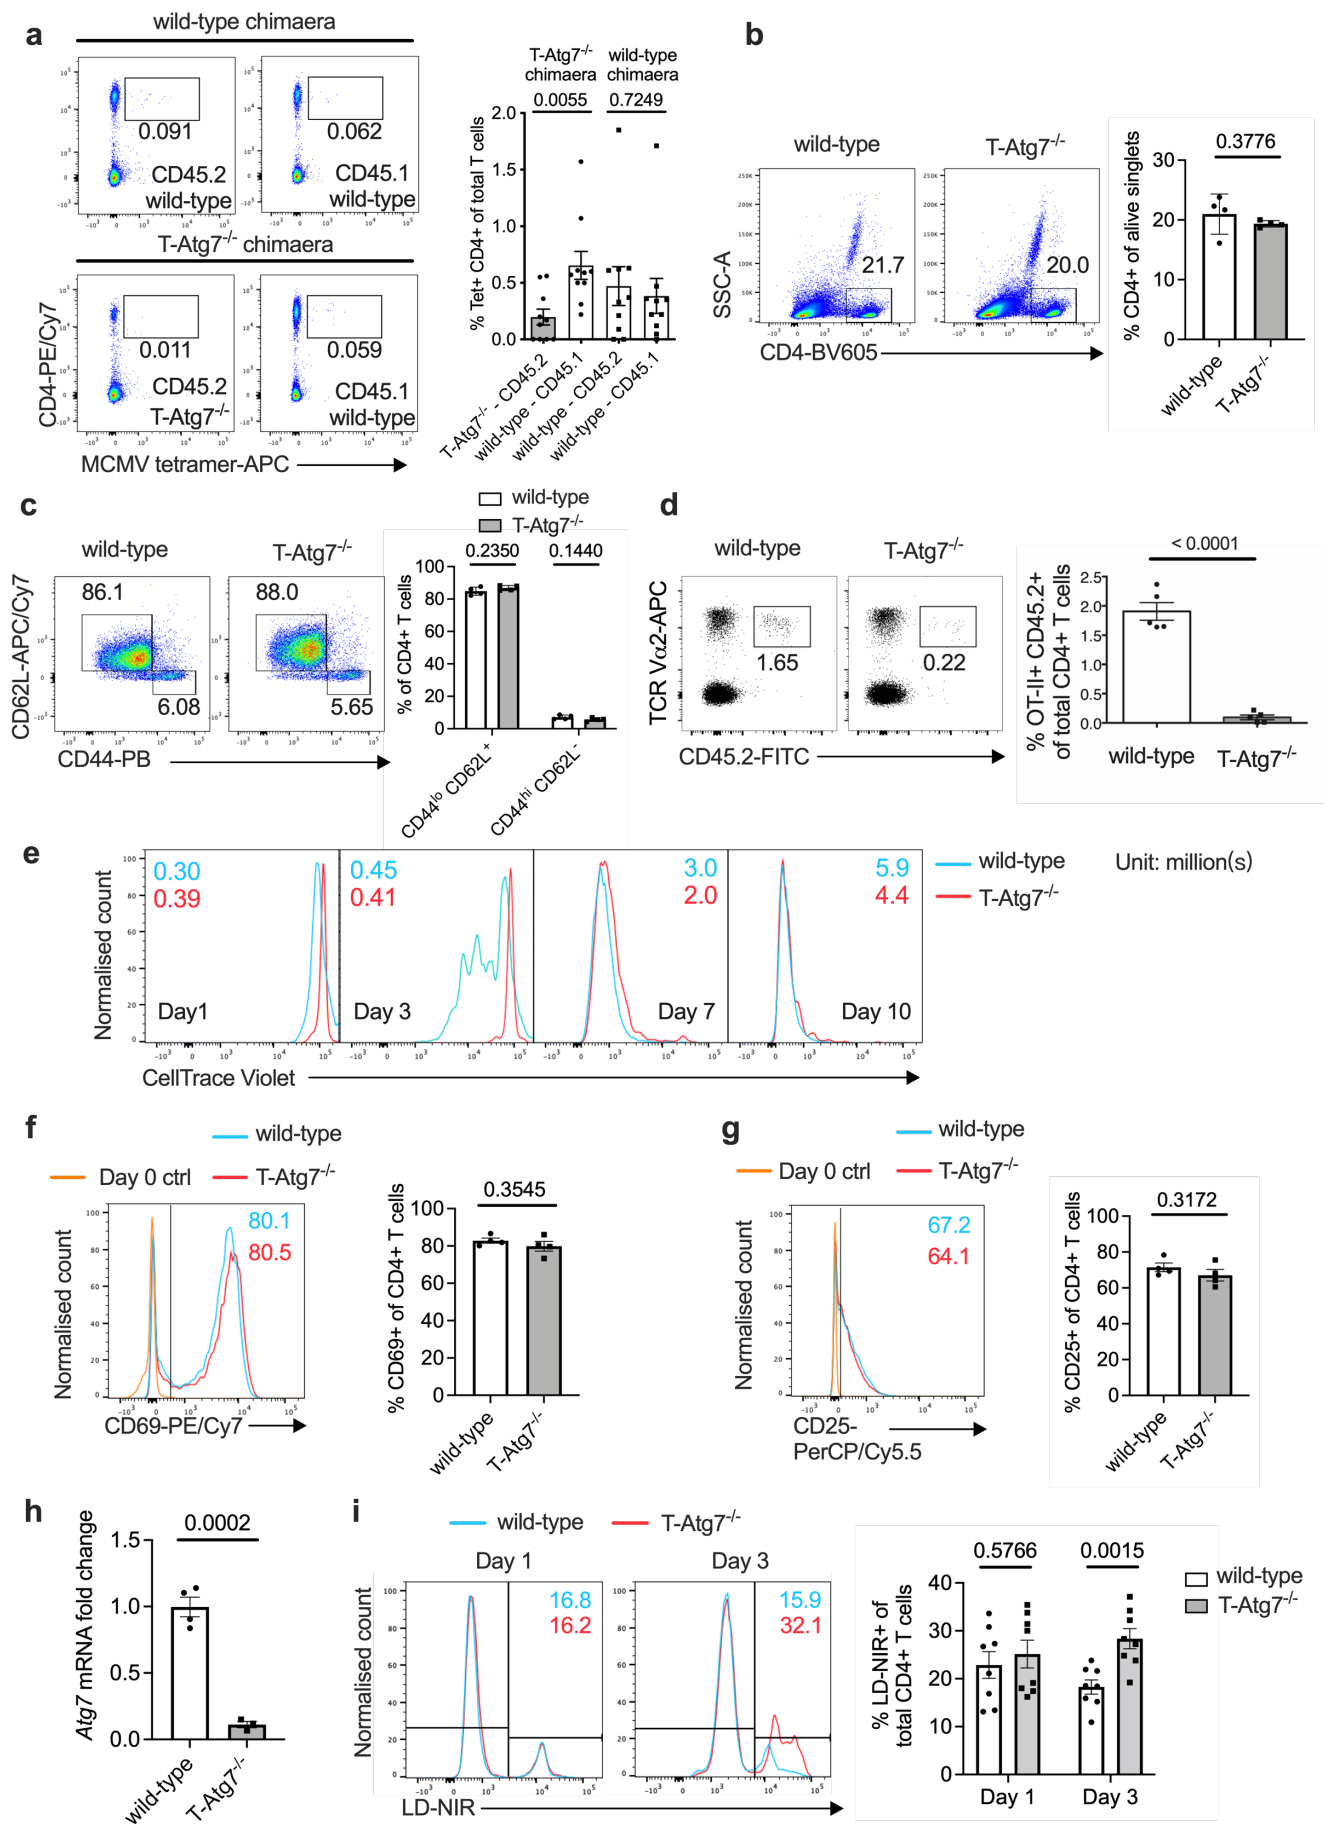

**Supplementary Fig. 1 Autophagy-deficient CD4<sup>+</sup> T cells show delayed proliferation.**

**(a)** Dot plots (left) of murine cytomegalovirus (MCMV)-specific CD4<sup>+</sup> T cells among CD19<sup>-</sup> population from lungs of CD45.2<sup>+</sup> wild-type or T-Atg7<sup>-/-</sup> donors and CD45.1<sup>+</sup> donors. Bar graph (right) indicates the percentage of Tet (tetramer)<sup>+</sup> CD4<sup>+</sup> T cells within CD45.2<sup>+</sup> CD19<sup>-</sup> or CD45.1<sup>+</sup> CD19<sup>-</sup> population ( $n = 9$  mice per group) as mean  $\pm$  SEM with paired two-tailed Student's *t* test.

**(b, left)** and **(c, left)** show dot plots of splenic CD4<sup>+</sup> T cells, and CD44<sup>hi</sup> CD62L<sup>-</sup> T cells within total CD4<sup>+</sup> T cells, in 6–8-week wild-type or T-Atg7<sup>-/-</sup> OT-II mice. Bar graphs **(b and c, right)** indicate the percentages of gated populations within total splenocytes ( $n = 4$  mice per group).

**(d)** Dot plots (left) are gated on CD45.2<sup>+</sup>, TCR V $\alpha$ 2<sup>+</sup> in the blood of recipient mice. Bar graph (right) depicts the frequency of gated population within total CD4<sup>+</sup> T cell population ( $n = 5$  mice per group).

**(e)** Splenic OT-II<sup>+</sup> T cells from wild-type or T-Atg7<sup>-/-</sup> mice were stimulated with ovalbumin for 1, 3, 7 or 10 days in vitro. Histograms represent OT-II<sup>+</sup> CD4<sup>+</sup> T cell proliferation. Number indicates the total cell number of gated population in million(s).

**(f, left)** and **(g, left)** show histograms of CD69<sup>+</sup> and CD25<sup>+</sup> population within CD4<sup>+</sup> T cells on day 1 of activation in vitro. Bar graphs **(f and g, right)** indicate the percentages of gated populations within live CD4<sup>+</sup> population ( $n = 4$  mice per group).

**(h)** Quantification of *Atg7* mRNA level in flow cytometry-sorted most divided splenic CD4<sup>+</sup> T cells activated for 7 days (gating strategy in Figure 1e, day 7) by qRT-PCR. Bar graph shows fold change in *Atg7* mRNA of T-Atg7<sup>-/-</sup> normalised to wild-type ( $n = 3$  mice for wild-type group,  $n = 4$  mice for T-Atg7<sup>-/-</sup> group) as mean  $\pm$  SEM with unpaired two-tailed Student's *t* test.

**(i, left)** show histograms of LIVE/DEAD Fixable Near-IR (LD-NIR)+ population within CD4+ T cells, on day 1 and 3 of activation in vitro. Bar graph **(i, right)** indicates the percentage of gated population within live CD4+ population ( $n = 8$  mice per group).

All data except for (a) are represented as mean  $\pm$  SEM with unpaired two-tailed Student's  $t$  test. Exact  $p$  values are depicted in the figure. All experiments are representative of three independent experiments. Source data are provided as a Source Data file.

Supplementary Fig. 2

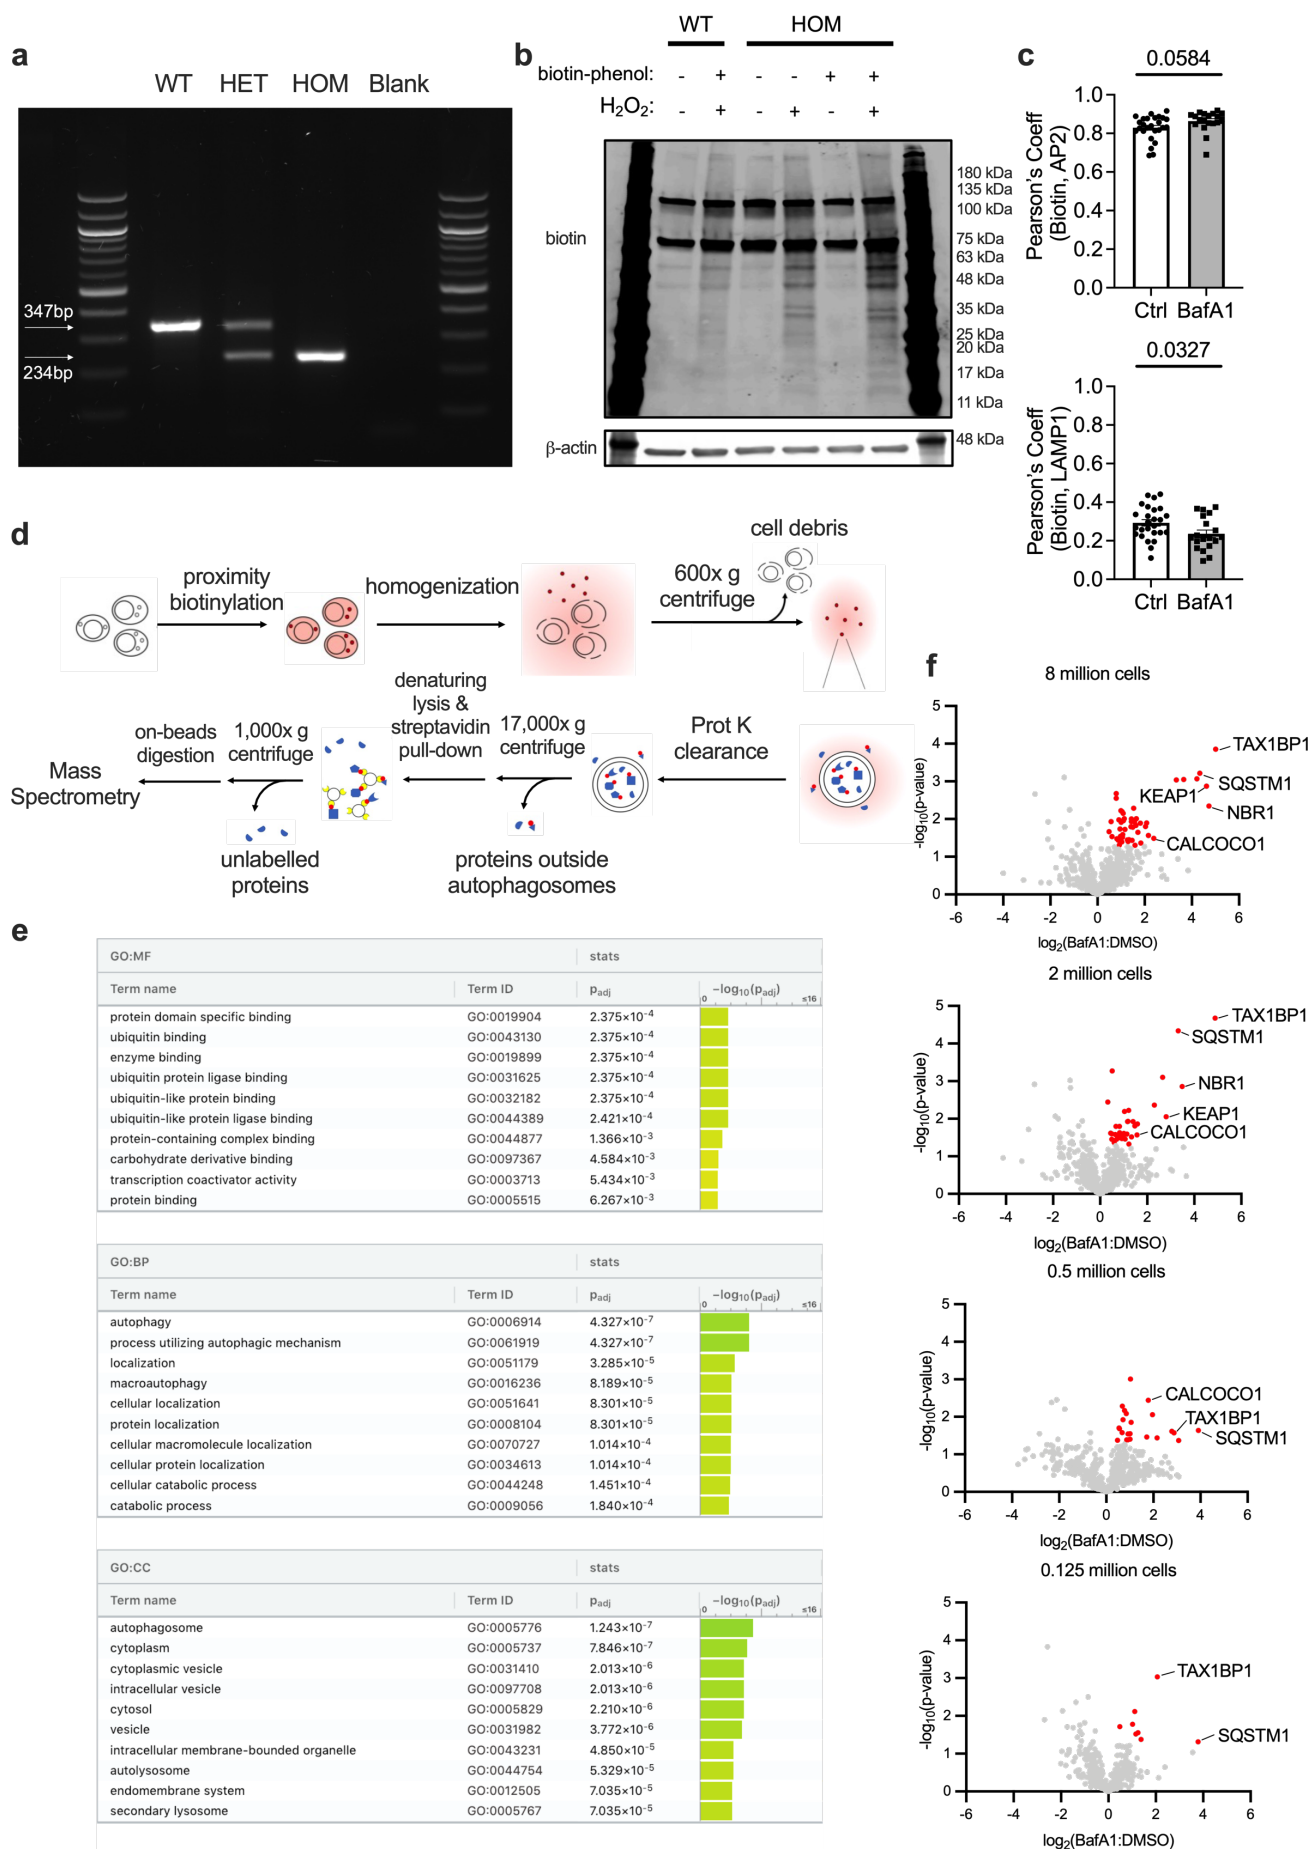

**Supplementary Fig. 2 Validation of the *Lc3b-AP2* transgenic mouse model.**

**(a)** PCR genotyping of the *Lc3b-AP2* mouse model (WT, wild-type; HET, heterozygote; HOM, homozygote).

**(b)** Biotinylated protein profiles of whole-cell homogenates from splenocytes of wild-type (WT) or homozygotes (HOM), activated with 10 µg/mL lipopolysaccharides for 3 days. Cells were left untreated or labelled with biotin-phenol and/or H<sub>2</sub>O<sub>2</sub>. These experiments were repeated as biological triplicates with similar results.

**(c)** Bar graphs show Pearson's correlation coefficient between Biotin and APEX2 (AP2) (upper), as well as Biotin and LAMP1 (lower). Data are represented as mean ± SEM, with unpaired two-tailed Student's *t* test, *n* = 26 cells for Ctrl group, *n* = 19 cells for bafilomycin A1 (BafA1) group. Exact *p* values are depicted in the figure.

**(d)** Schematic overview of the procedure of purifying autophagosomal biotinylated proteins.

**(e)** Gene Ontology (GO) enrichment analysis of BafA1-upregulated proteins with the top terms for molecular function (MF), biological pathway (BP) and cellular compartment (CC). *p<sub>adj</sub>* are *p* values adjusted for multiple testing using the Benjamini-Hochberg method.

**(f)** Volcano plots of proteins labelled by APEX2-LC3B in immortalised mouse embryonic fibroblast cells, with the titration of different cell numbers. Proteins significantly upregulated in BafA1-treated samples are highlighted in red (*p* < 0.05 by unpaired two-tail Student's *t* test, *n* = 3 biological replicates per group).

Source data are provided as a Source Data file.

Supplementary Fig. 3

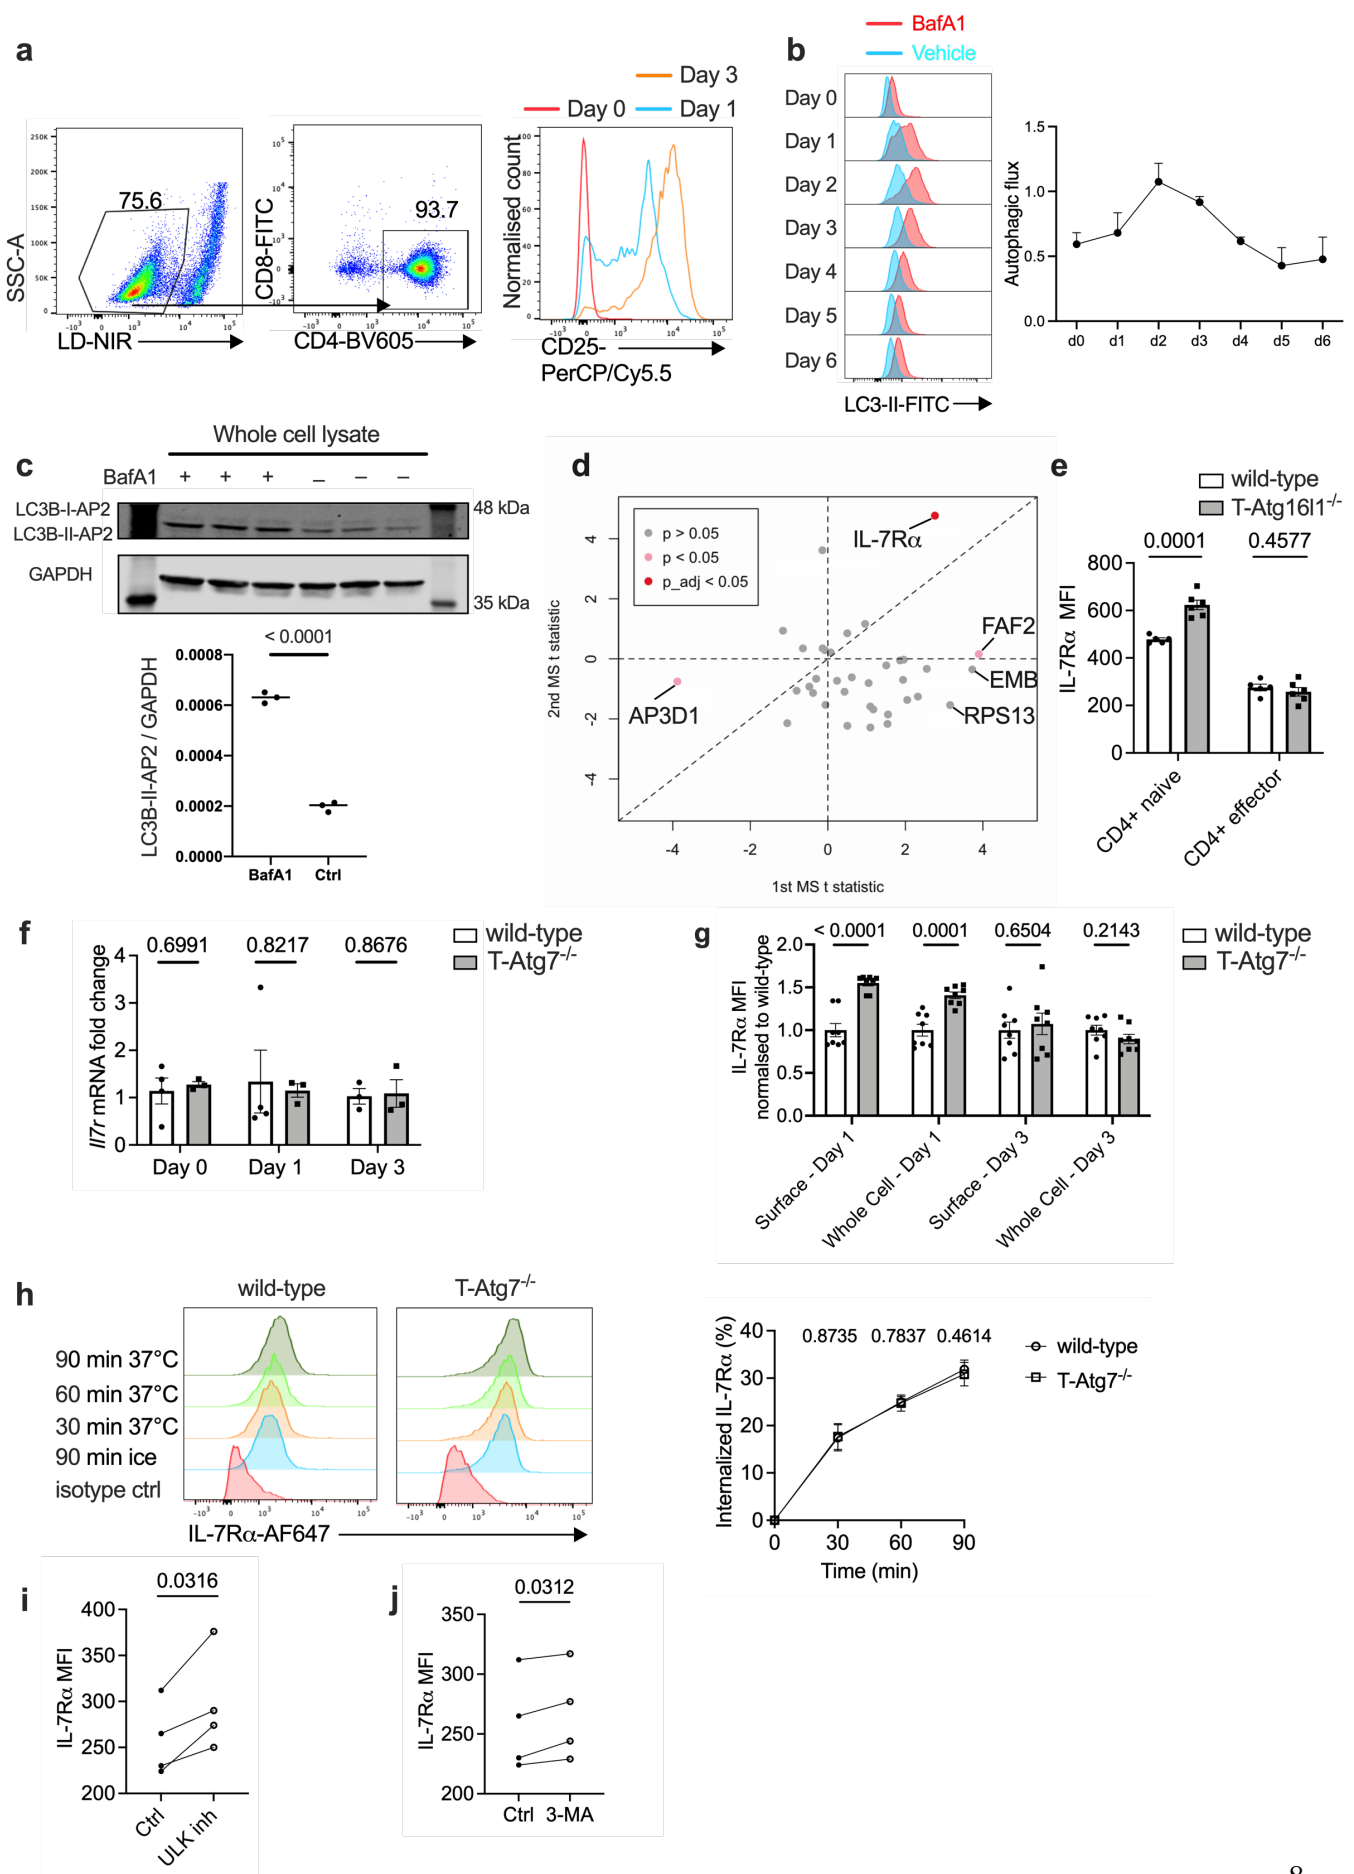



**Supplementary Fig. 3 IL-7R $\alpha$  is an autophagosomal cargo in CD4<sup>+</sup> T cells.**

**(a)** Dot plots (left) displaying the survival rate and the purity of CD4<sup>+</sup> T cells 3 days post-activation. Histogram (right) depicts the surface level of CD25 gated on live CD4<sup>+</sup> T cells on days 0, 1 and 3 of activation.

**(b)** LC3-II histograms (left) of activated CD4<sup>+</sup> T cells on corresponding days, which were treated or not with BafA1 for 2 hours before staining. Autophagic flux (right) was calculated by the LC3-II geometric mean fluorescent intensity (BafA1 - Vehicle)/Vehicle,  $n = 3$  mice. Data are represented as mean  $\pm$  SEM.

**(c)** Western blot (upper) and quantitative analysis (lower) of LC3B-AP2 expression level in activated CD4<sup>+</sup> T cells on day 3 post-activation,  $n = 3$  mice per group.

**(d)** Meta-analysis of 36 proteins detected in both proximity-biotinylation experiments in 3-day-activated CD4<sup>+</sup> T cells. Pink dots indicate the proteins upregulated upon BafA1-treatment with nominal  $p < 0.05$ , whereas red dot indicates the protein with  $p < 0.05$  after Benjamini-Hochberg correction.

**(e)** Bar graph depicting surface IL-7R $\alpha$  level as mean fluorescent intensity (MFI) in different CD4<sup>+</sup> subtypes from wild-type and CD4<sup>cre</sup> *Atg16l1<sup>fl/fl</sup>* (T-*Atg16l1<sup>-/-</sup>*) mice,  $n = 5$  mice for Ctrl group,  $n = 6$  mice for T-*Atg16l1<sup>-/-</sup>* group.

**(f)** Quantification of *Ii7ra* mRNA expression in splenic CD4<sup>+</sup> T cells without activation, activated for 1 day or 3 days. Bar graph shows the fold change in *Ii7ra* mRNA of T-*Atg7<sup>-/-</sup>* normalised to wild-type,  $n = 4$  mice on day 1 and 2 for wild-type group,  $n = 3$  mice on day 1 and 2 for T-*Atg7<sup>-/-</sup>* group,  $n = 3$  mice on day 3 for both groups.

**(g)** Bar graph summarising flow results of both surface and whole-cell IL-7R $\alpha$  level in CD4<sup>+</sup> T cells activated for 1 or 3 days in vitro. Fold change in IL-7R $\alpha$  geometric mean fluorescence intensity of T-*Atg7<sup>-/-</sup>* normalised to wild-type is shown,  $n = 8$  mice per group.

**(h)** Internalisation of surface IL-7R $\alpha$  on naïve CD4<sup>+</sup> T cells was performed with a biotin-based flow cytometric endocytosis assay. Histograms (left) show biotin-conjugated IL-7R $\alpha$  antibody level. Connected scatter plot (right) indicates the percentage of internalised IL-7R $\alpha$  at 30, 60, and 90 min at 37 °C,  $n = 6$  mice per group.

**(i)** and **(j)** Levels of IL-7R $\alpha$  gated on naïve CD4<sup>+</sup> T cells from wild-type mice, treated or not with 2.5  $\mu$ M SBI-0206965 (i, ULK inh) or 10  $\mu$ M 3-methyladenine (j, 3-MA) for 20 hours. Statistics by paired two-tailed Student's  $t$  test,  $n = 4$  mice per group.

All values represented as mean  $\pm$  SEM with unpaired two-tailed Student's  $t$  test unless being further addressed. Exact  $p$  values are depicted in the figure. Quantitative analyses are representative of three independent experiments with similar results. Source data are provided as a Source Data file.

## Supplementary Fig. 4

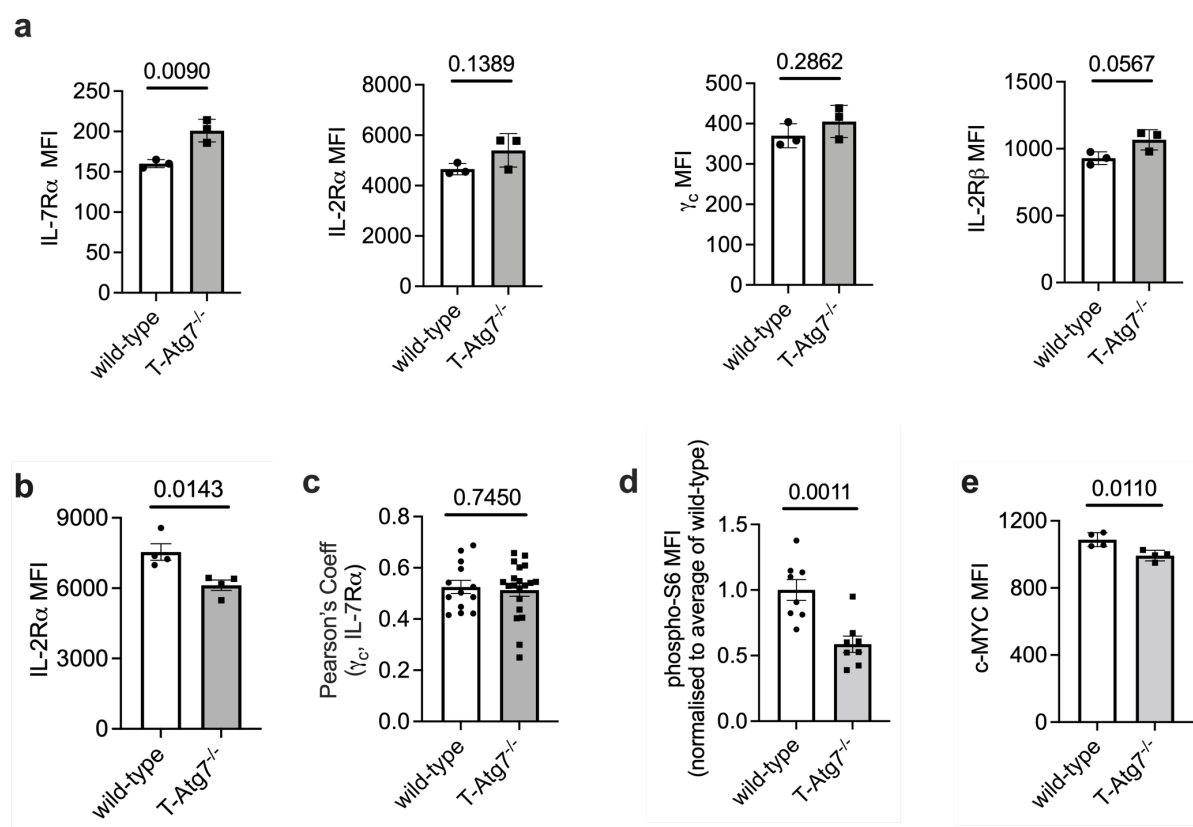**Supplementary Fig. 4 Impaired IL-2R assembly in activated T-Atg7<sup>-/-</sup> CD4<sup>+</sup> T cells.**

**(a)** Splenic naïve CD4<sup>+</sup> T cells purified from either wild-type or T-Atg7<sup>-/-</sup> mice were activated with anti-CD3/CD28 Dynabeads for 24 hours. The surface receptor levels were assessed with flow cytometry. Bar graphs depict surface levels of IL-7R $\alpha$ , IL-2R $\alpha$ , common gamma chain ( $\gamma_c$ ) and IL-2R $\beta$  on activated CD25<sup>+</sup> CD4<sup>+</sup> T cells,  $n = 3$  mice per group.

**(b)** Bar graph of CD25 surface level, gated on activated CD4<sup>+</sup> T cells activated for 3 days in vitro,  $n = 4$  mice per group.

**(c)** Naïve CD4<sup>+</sup> T cells were pre-treated with anti-CD3/CD28 Dynabeads for 24 hours to upregulate IL-2R $\alpha$ . Then, cells were exposed to supported lipid bilayers containing ICAM1 and anti-CD3 proteins and fixed after a 10-min incubation in the presence of 50 U ml<sup>-1</sup> of murine IL-2. Synapse formation was confirmed by the presence of an ICAM1 ring.

Cytokine receptors were stained for TIRF imaging. Bar graph shows Pearson's correlation coefficient of the co-localisation of IL-7R $\alpha$  and  $\gamma_c$  at the mature immune synapses of activated CD25<sup>+</sup> CD4<sup>+</sup> T cells, which were exposed to lipid bilayers and incubated with murine IL-2,  $n = 13$  cells for wild-type group,  $n = 20$  cells for T-Atg7<sup>-/-</sup> group.

**(d)** Bar graph shows the fold change in phospho-S6 geometric mean fluorescence intensity of CD25<sup>+</sup> CD4<sup>+</sup> T cells from T-Atg7<sup>-/-</sup> mice normalised to the ones from wild-type mice,  $n = 8$  mice per group.

**(e)** Bar graph shows the c-MYC geometric mean fluorescence intensity of CD25<sup>+</sup> CD4<sup>+</sup> T cells activated for 1 day, from both wild-type and T-Atg7<sup>-/-</sup> mice,  $n = 4$  mice per group.

All data are represented as mean  $\pm$  SEM with unpaired two-tailed Student's *t* test. Exact *p* values are depicted in the figure. Quantitative analyses are representative of three independent experiments with similar results. Source data are provided as a Source Data file.

**Supplementary Table 1. The sequences of the primers that were used in this research.**

| <b>Genes</b>                        | <b>Primer</b>                     |
|-------------------------------------|-----------------------------------|
| CD4 <sup>cre</sup> Fwd              | 5'-CGATGCAACGAGTGATGAGG-3'        |
| CD4 <sup>cre</sup> Rev              | 5'-GCATTGCTGTCACTTGGTCGT-3'       |
| <i>Atg7</i> WT Fwd                  | 5'-CCATGCTGATGGCTAATGTCTC-3'      |
| <i>Atg7</i> <sup>fllox</sup> Fwd    | 5'-CTGCAGGAATTCGATATCATAACTTCG-3' |
| <i>Atg7</i> Rev                     | 5'-GTCCAGAGTCCGGTCTCTGGTTG-3'     |
| <i>Lc3b-APEX2</i> Fwd               | 5'-GTGGGGAACCTCTCAACTGTCAG-3'     |
| <i>Lc3b-APEX2</i> Rev               | 5'-GTGGGGAACCTCTCAACTGTCAG-3'     |
| <i>Atg16l1</i> <sup>fllox</sup> Fwd | 5'-CTTTCTCAACAGAACCAGCAGTAC-3'    |
| <i>Atg16l1</i> <sup>fllox</sup> Rev | 5'-GTAGAAAGACTGGTGATGGTAAACC-3'   |
