# Supplementary material for: Mapping autophagosome contents identifies interleukin-7 receptor-α as a key cargo modulating CD4+ T cell proliferation
Source: PubMed Central journal article supplement (PMC9440129; doi:10.1038/s41467-022-32718-x), 2022-09-02
Supplement: 41467_2022_32718_MOESM3_ESM.pdf [file 41467_2022_32718_MOESM3_ESM.pdf]

## Description of Additional Supplementary Files

**Supplementary Data 1.** Proteinase K-protected and streptavidin-enriched proteins, using *Lc3B-AP2* imMEF cells treated with BafA1 or DMSO.

**Supplementary Data 2.** Proteinase K-protected and streptavidin-enriched proteins, using *Lc3B-AP2* CD4+ T cells activated with anti-CD3/CD28 beads for 3 days and treated with BafA1 or DMSO.

**Supplementary Data 3.** Meta-analysis combining proteinase K-protected and streptavidin-enriched proteins from two experiments, using *Lc3B-AP2* CD4+ T cells activated with anti-CD3/CD28 beads for 3 days and treated with BafA1 or DMSO.
